# Supplementary material for: Analysis of the influence of synthetic paramaters on the structure and physico-chemical properties of non-spherical iron oxide nanocrystals and their biological stability and compatibility
Source: Royal Society of Chemistry journal article supplement (doi:10.1039/c5dt03923a), 2015-11-13
Supplement: c5dt03923a1.pdf [file c5dt03923a1.pdf]

## SUPPLEMENTARY INFORMATION FOR

**Analysis of the influence of synthetic paramaters on the structure and physico-chemical properties of anisotropic iron oxide nanocrystals and their biological stability and compatibility.**

Alberto Pardo,<sup>a</sup> Rosa Pujales,<sup>a</sup> Mateo Blanco,<sup>a</sup> Eva M. Villar,<sup>a</sup> Silvia Barbosa,<sup>\*a</sup> Pablo Taboada,<sup>\*a</sup> Víctor Mosquera<sup>a</sup>

*<sup>a</sup>Grupo de Física de Coloides y Polímeros, Departamento de Física de la Materia Condensada; 15782-Santiago de Compostela, Spain*

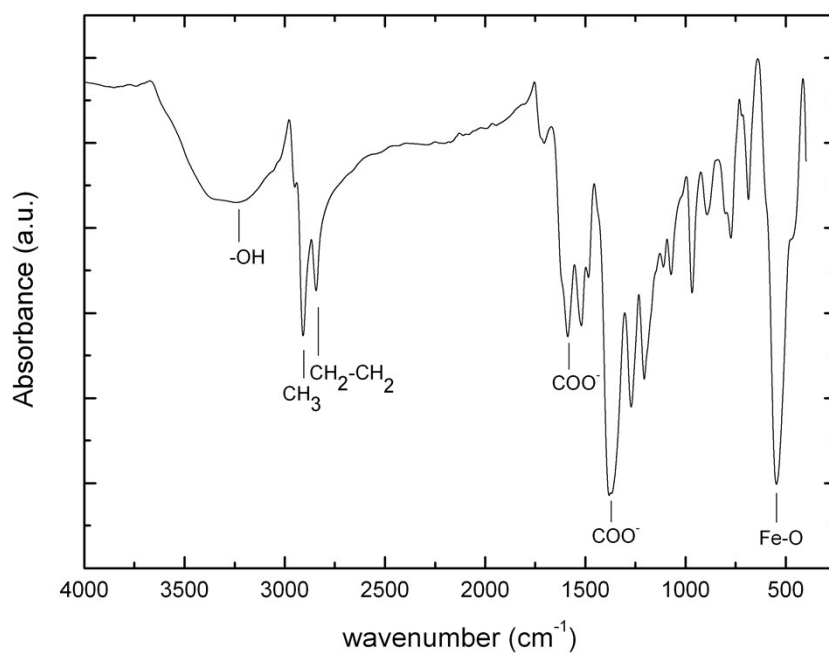

**Figure S1:** FTIR spectrum of as-synthesized 48 nm IONCS.

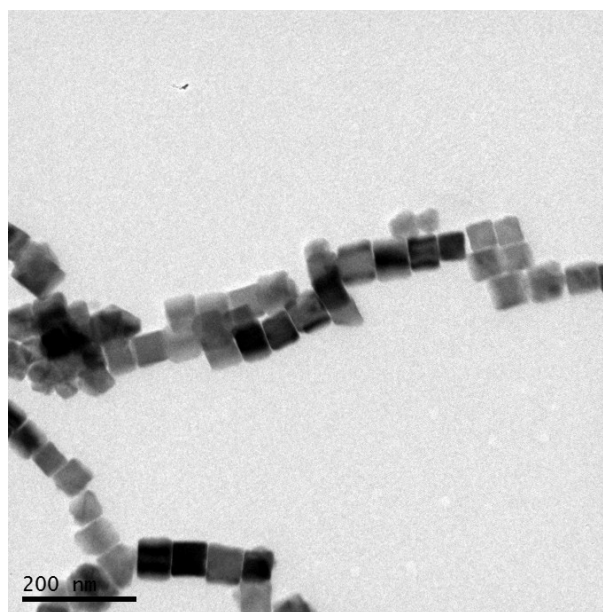

**Figure S2:** TEM image of IONCS obtained at a reaction temperature of 265  $^{\circ}\text{C}$ .

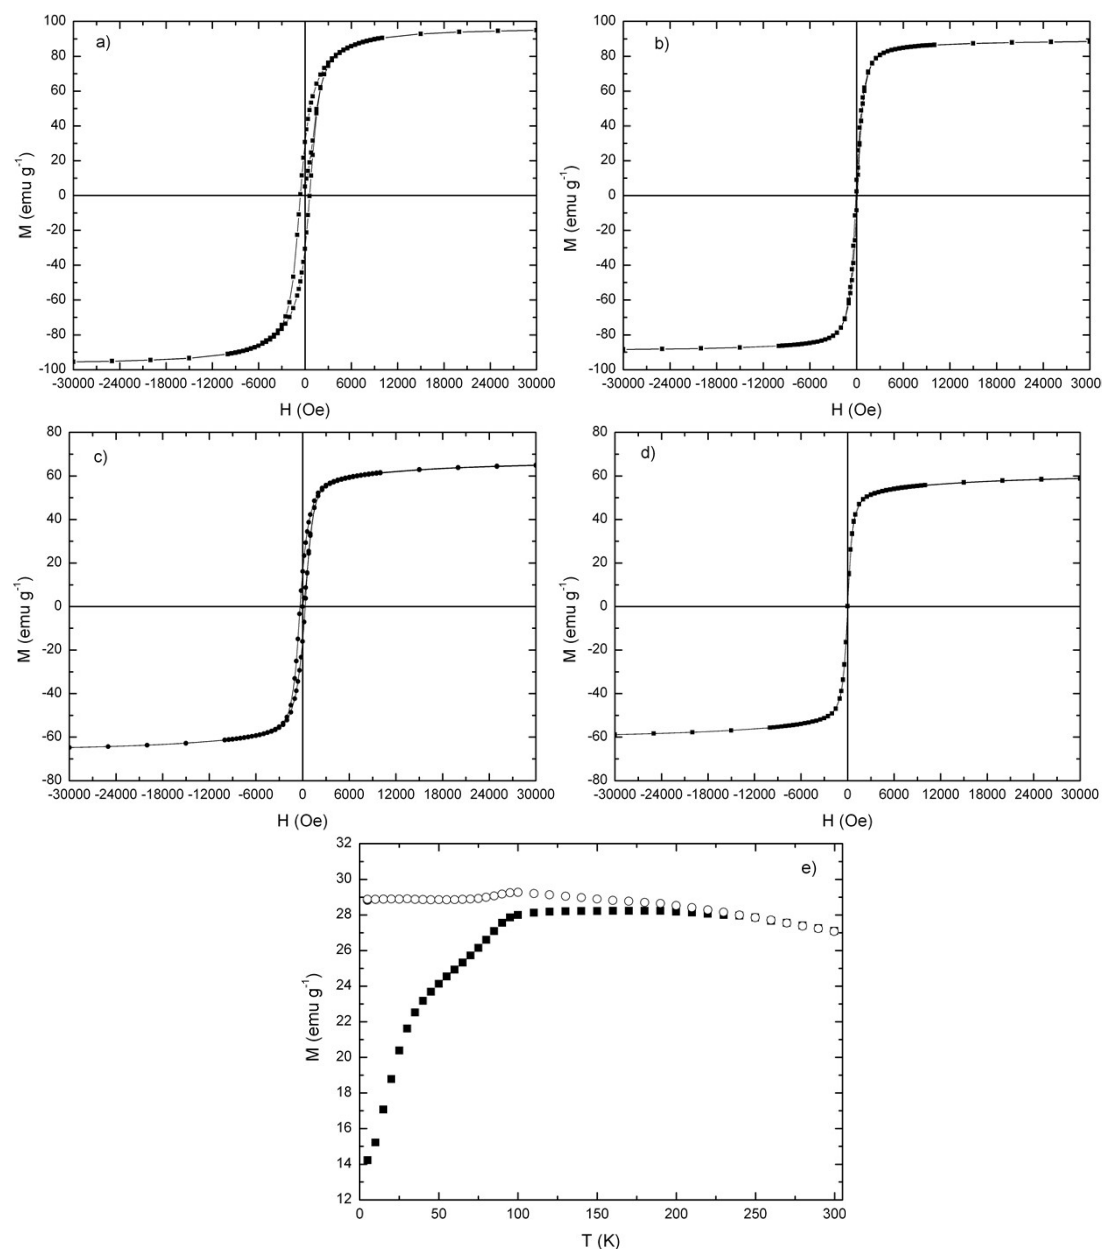

**Figure S3:** Magnetization as a function of the applied magnetic field for 94 nm (a,b) and 28 nm IONCS (c,d) at 5 and 300 K, respectively. e) ZFC (●) and FC (○) curves of powder 28 nm IONCs samples.

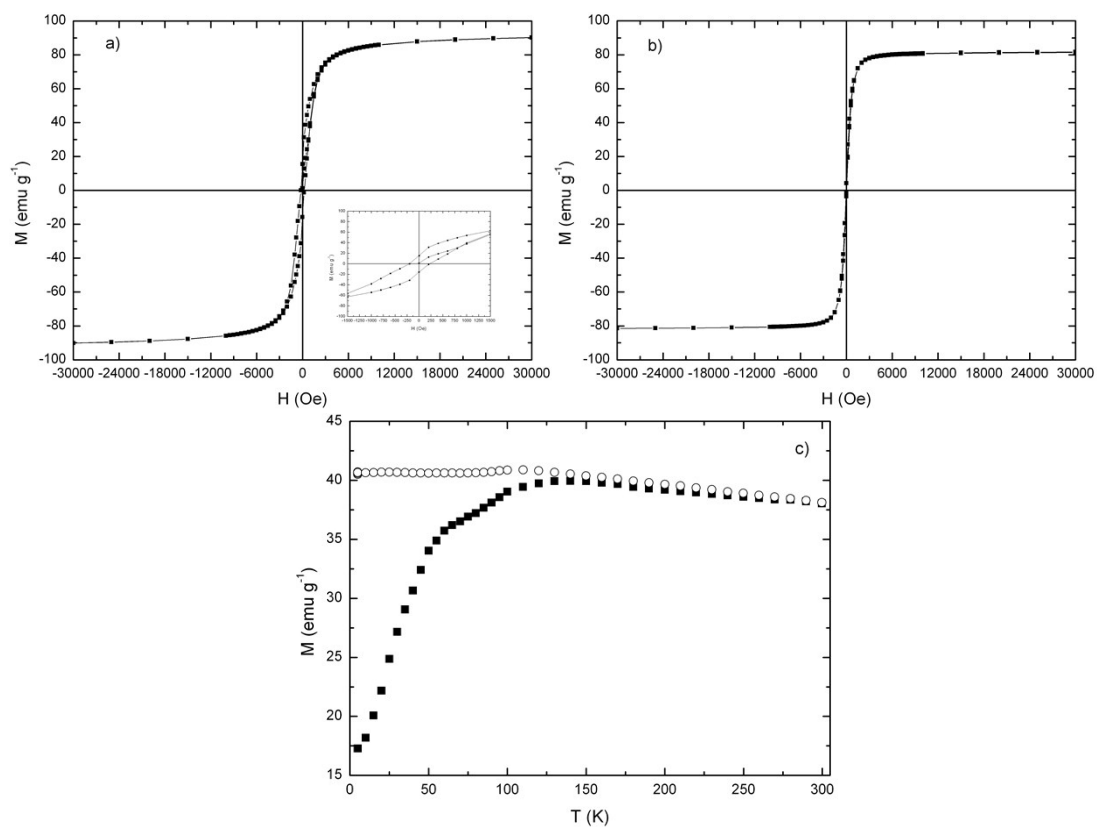

**Figure S4:** Magnetization as a function of the applied magnetic field for the powder 55 nm cubooctahedra samples at a) 5 and b) 300 K. c) ZFC (●) and FC (○) curves of powder 55 nm cubooctahedra samples.

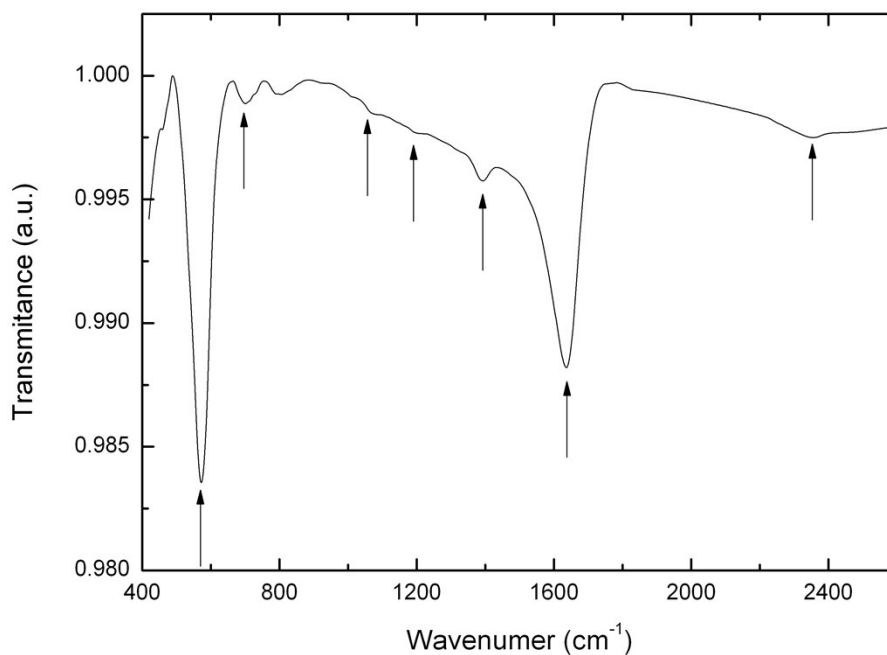

**Figure S5:** FTIR spectrum of DMSA-coated IONCs.

The spectrum of DMSA-coated IONCs showed bands at 1620 to the vibration of the C=O. The band present at 1370 cm<sup>-1</sup> is due to vibrations of CH<sub>2</sub> groups. At 2340 cm<sup>-1</sup>, a weak band assigned to the vibration of S-H bond is observed. Furthermore, a shoulder at 1178 can be assigned to C=O stretching modes. The small band at 1055 cm<sup>-1</sup> can correspond to the vibration of the bond S-CH. The signals at ca. 545 cm<sup>-1</sup> corresponds to the Fe-O vibration related to the magnetite phase.

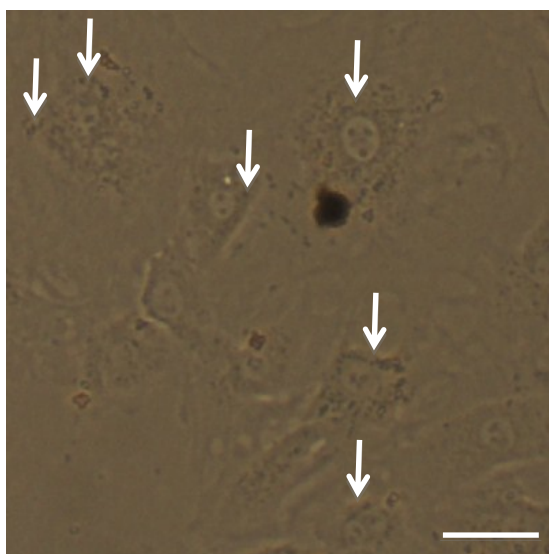

**Figure S6:** Bright field microscopy of MSC cells. The arrows denote the presence of IONCs inside the cells. Scale bar 20 nm.

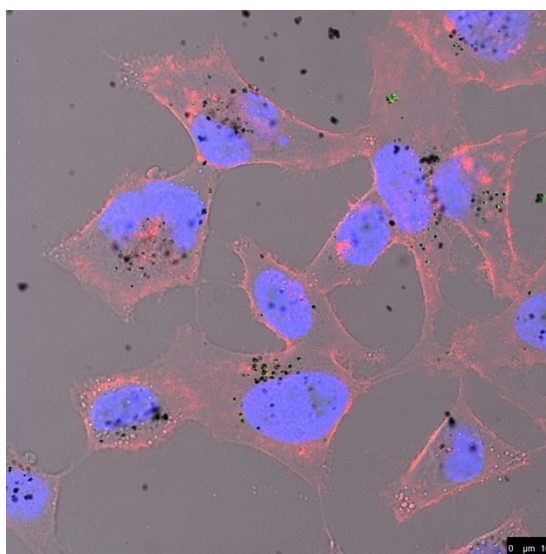

**Figure S7:** Merged fluorescence microscopy of HeLa cells denoting the internalization of DMSA-coated IONCs inside the cells without altering their cytoskeleton. Cell nuclei are stained with DAPI (in blue), and the actin of cytoplams with Bodipy Phalloidin (in red).
